# Supplementary material for: Structural insights into the assembly and activation of the IL‐27 signaling complex
Source: PubMed Central journal article supplement (PMC9535766; doi:10.15252/embr.202255450), 2022-08-03
Supplement: EMBR-23-e55450-s003.pdf [file EMBR-23-e55450-s003.pdf]

## CryoEM data collection and model validation statistics

| <b>IL-27:IL-27R<math>\alpha</math>(D1-2):GP130(D1-3)</b> |                  |                                      |
|----------------------------------------------------------|------------------|--------------------------------------|
| <b>Data Collection and processing</b>                    | Dataset1         | Dataset2                             |
| <b>Microscope</b>                                        | Titan Krios      | Titan Krios                          |
| <b>Camera</b>                                            | K3               | K3                                   |
| <b>Magnification</b>                                     | 81,000x          | 81,000x                              |
| <b>Voltage</b>                                           | 300              | 300                                  |
| <b>Electron exposure (e-/Å<sup>2</sup>)</b>              | 50               | 50                                   |
| <b>Defocus range (μm)</b>                                | -0.5 to -2.25    | -1.5 to -2.7                         |
| <b>Pixel Size (Å/pixel)</b>                              | 1.06             | 1.06                                 |
| <b>Symmetry imposed</b>                                  | C1               | C1                                   |
| <b>Initial micrographs</b>                               | 28,437 (0° tilt) | 21,474 (30° tilt)<br>6,12 (35° tilt) |
| <b>Final micrographs</b>                                 | 17,228           | 18,838                               |
| <b>Particles from 2D classification</b>                  | 627,181          | 1,184,217                            |
| <b>Final particle images</b>                             | 203,411 (Merged) |                                      |
| <b>Global map resolution (Å)</b>                         | 4.0              |                                      |
| <b>FSC threshold</b>                                     | 0.143            |                                      |
| <b>Map sharpening B factor (Å<sup>2</sup>)</b>           | -100             |                                      |
| <b>Model statistics</b>                                  |                  |                                      |
| <b>Non hydrogen atoms</b>                                | 7,040            |                                      |
| <b>Protein residues</b>                                  | 856              |                                      |
| <b>Ligands</b>                                           | 0                |                                      |
| <b>B factors</b>                                         | 192.42           |                                      |
| <b>R.M.S deviations</b>                                  |                  |                                      |
| <b>Bond lengths</b>                                      | 0.004            |                                      |
| <b>Bond angles</b>                                       | 0.755            |                                      |
| <b>MolProbity score</b>                                  | 1.79             |                                      |
| <b>Clashscore</b>                                        | 8.06             |                                      |
| <b>Poor rotamers (%)</b>                                 | 0.65             |                                      |
| <b>Ramachandran plot</b>                                 |                  |                                      |
| <b>Favoured (%)</b>                                      | 94.88            |                                      |
| <b>Allowed (%)</b>                                       | 5.12             |                                      |
| <b>Outliers (%)</b>                                      | 0                |                                      |
